# Supplementary material for: Active site engineering of Fe- and Ni-sites for highly efficient electrochemical overall water splitting
Source: Royal Society of Chemistry journal article supplement (doi:10.1039/c8ta08217k), 2018-01-01
Supplement: c8ta08217k1.pdf [file c8ta08217k1.pdf]

## Supplementary data

### **Active Site Engineering of Fe- and Ni-sites for Highly Efficient Electrochemical Overall Water Splitting**

Lejuan Cai, Bocheng Qiu, Ziyuan Lin, Yang Wang, Sainan Ma, Mengye Wang, Yuen Hong Tsang  
and Yang Chai\*

Department of Applied Physics, The Hong Kong Polytechnic University, Hung Hom, Kowloon,  
Hong Kong, People's Republic of China

\*To whom the correspondence should be addressed: [y.chai@polyu.edu.hk](mailto:y.chai@polyu.edu.hk)

## Experimental section

**Synthesis and Preparation:** Fe-doped Ni<sub>2</sub>P was synthesized directly onto SS mesh using a chemical bath deposition technique followed by phosphorization process. Ni(NO<sub>3</sub>)<sub>2</sub>·6H<sub>2</sub>O (1.454 g) and NH<sub>4</sub>NO<sub>3</sub> (0.2 g) were added into 35 mL of de-ionized water. Then 5 mL of 28 wt% ammonia was added into the green solution and formed dark blue nickel ammonia complex. After stirring in air for 10 min, the solution was poured into a round-bottom flask and pre-heated at 85 ° C for 1 h. Meanwhile, a stainless steel (SS) mesh was sequentially cleaned in isopropanol, acetone and de-ionized water, and treated with 10% HCl for 10 min before rinsed with DI water. Next, the SS was placed into the pre-heated nickel ammonia and the flask were kept at 85 ° C for different time duration to obtain Fe-doped Ni(OH)<sub>2</sub>/SS. The iron in Fe-doped Ni(OH)<sub>2</sub>/SS was derived from the substitutional reaction between [Ni(NH<sub>3</sub>)<sub>6</sub>]<sup>2+</sup> and iron in SS mesh. The Ni(OH)<sub>2</sub>-HF and Ni(OH)<sub>2</sub>-LF were prepared after one-hour and three-hour deposition time, respectively.

To prepare Fe-doped Ni<sub>2</sub>P/SS, Fe-doped Ni(OH)<sub>2</sub>/SS and 0.5 g NaH<sub>2</sub>PO<sub>2</sub> were put in a quartz boat and NaH<sub>2</sub>PO<sub>2</sub> was placed at the upstream. Subsequently, the quartz boat was transferred into a tube furnace. The heating center temperature of the furnace was raised up to 300 °C with the heating rate of 5 °C/min and held at this temperature for 120 min in an Ar flow with a flow rate of 20 sccm. The obtained Fe-doped Ni<sub>2</sub>P on SS mesh derived from Ni(OH)<sub>2</sub>-HF and Ni(OH)<sub>2</sub>-LF were denoted Ni<sub>2</sub>P-HF and Ni<sub>2</sub>P-LF, respectively.

**Electrochemical Tests:** A three electrodes electrochemical station was used to test electrochemical performance (CHI 660D). All electrochemical tests were performed in 50 mL of 1.0 M KOH electrolyte (pH = 14.0). The prepared sample, Hg/HgO and graphite rod were applied

as working electrode, reference electrode and counter electrode, respectively. The performance of the OER was tested using linear sweep voltammetry (LSV) with a scanning window of 1.2 V to 1.6 V vs RHE and a scan rate of 2 mV s<sup>-1</sup>. The performance of the HER was tested using linear sweep voltammetry (LSV) with a scanning window of 0 V to -0.6 V vs RHE and a scan rate of 2 mV s<sup>-1</sup>. The durability of HER and OER electrochemical performance were evaluated by time-dependent overpotential curve at a static current density of 100 mA/cm<sup>2</sup>. All the LSV curves are corrected with iR compensation.

In Ni<sub>2</sub>P-HF || Ni<sub>2</sub>P-LF electrolyzer, Ni<sub>2</sub>P-HF and Ni<sub>2</sub>P-LF (1 cm × 1 cm) were employed as anode and cathode materials, respectively. Cu electrode holder was applied to connect the working electrodes, as Cu possesses great electrical conductivity and negligible water splitting performance. LSV curves was also conducted in 1.0 M KOH solution with a scan rate of 5 mV s<sup>-1</sup> between 1.0 and 1.9 V and the LSV curve was corrected with iR compensation.

**Electrochemical active surface area:** The active surface area of the prepared samples was estimated by electrochemical capacitance measurements, because the current in non-faradic region is expected to be linearly proportional to the active surface area. The applied potential was set between 0.01 to 0.11 V vs. Hg/HgO for 50 cycles at different scan rates. The capacitive currents were collected at 0.98 V vs RHE. Then, the capacitive currents were plotted as a function of scan rate to calculate the double layer capacitance.

**Characterizations:** The morphology of SS and SSP samples were characterized by scanning electron microscope, scanning transmission electron microscope (SEM, Jeol JSM-6335F & TEM, Jeol JEM-2100F). The crystal structure and composition were measured by X-ray Diffractometer

(Rigaku SmartLab) and Raman spectroscopy (Witec Confocal Raman system) with an excitation wavelength of 532 nm. The electrochemical impedance spectroscopy (EIS) was performed in Solartron Electrochemical workstation (German) with the frequency ranging from 0.01 to  $10^5$  Hz. The surface valence state of sample was tested by using X-ray photoelectron spectroscopy (XPS, Thermol Scientific Escalab 250Xi, Al K $\alpha$  radiation).

**Theoretical Calculations:** Theoretical calculations were performed using density functional theory (DFT) as implemented in the VASP code (5.4.3) with exchange-correlation energy functional, which were modeled by Perdew-Burke-Ernzerhof (PBE) functional.<sup>[46]</sup> The cut-off energy was set to be 450 eV and all structures were relaxed to an energy convergence of  $10^{-4}$  eV/atom and a force convergence of 0.02 eV/Å, respectively. During the geometrical optimization, a (3 × 2) Ni<sub>2</sub>P surface with exposed (1 -1 0) was applied to investigate the adsorption behavior of intermediates (including H<sub>2</sub>O, H\*, OH\*, O\* and OOH\*) involved in HER and OER process. The k-points was 3 × 3 × 1 in slab optimization and 5 × 5 × 1 in static calculation. The thickness of vacuum in all the models was set to 30 Å to eliminate the interactions between the layers caused by the periodic boundary condition.



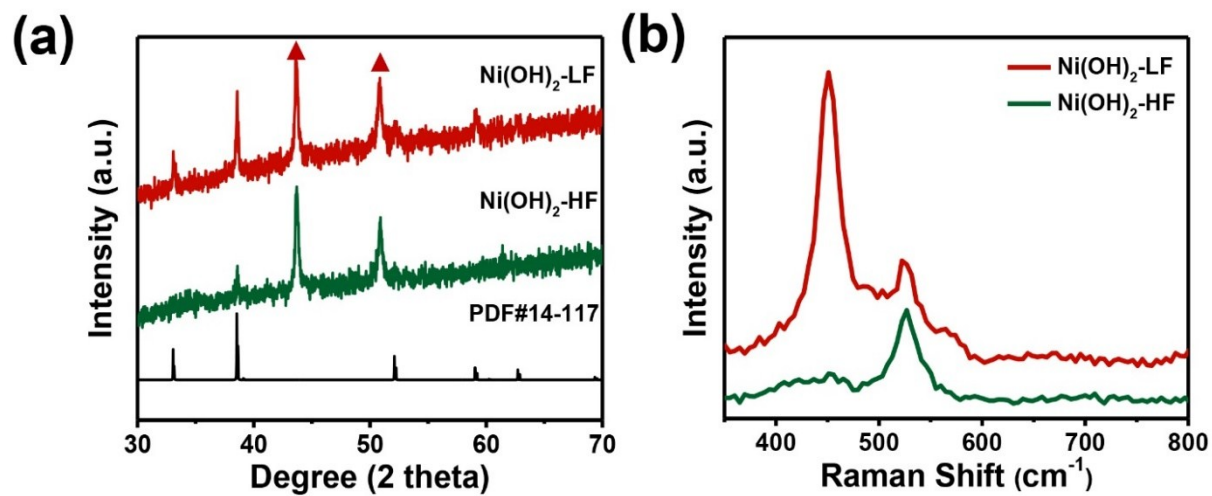

**Figure S1.** (a) XRD patterns of  $\text{Ni(OH)}_2\text{-HF}$  and  $\text{Ni(OH)}_2\text{-LF}$  on SS mesh. The typical peak of stainless steel is denoted with red triangle. (b) Raman spectrum of  $\text{Ni(OH)}_2\text{-HF}$  and  $\text{Ni(OH)}_2\text{-LF}$  collected at low wavenumber.

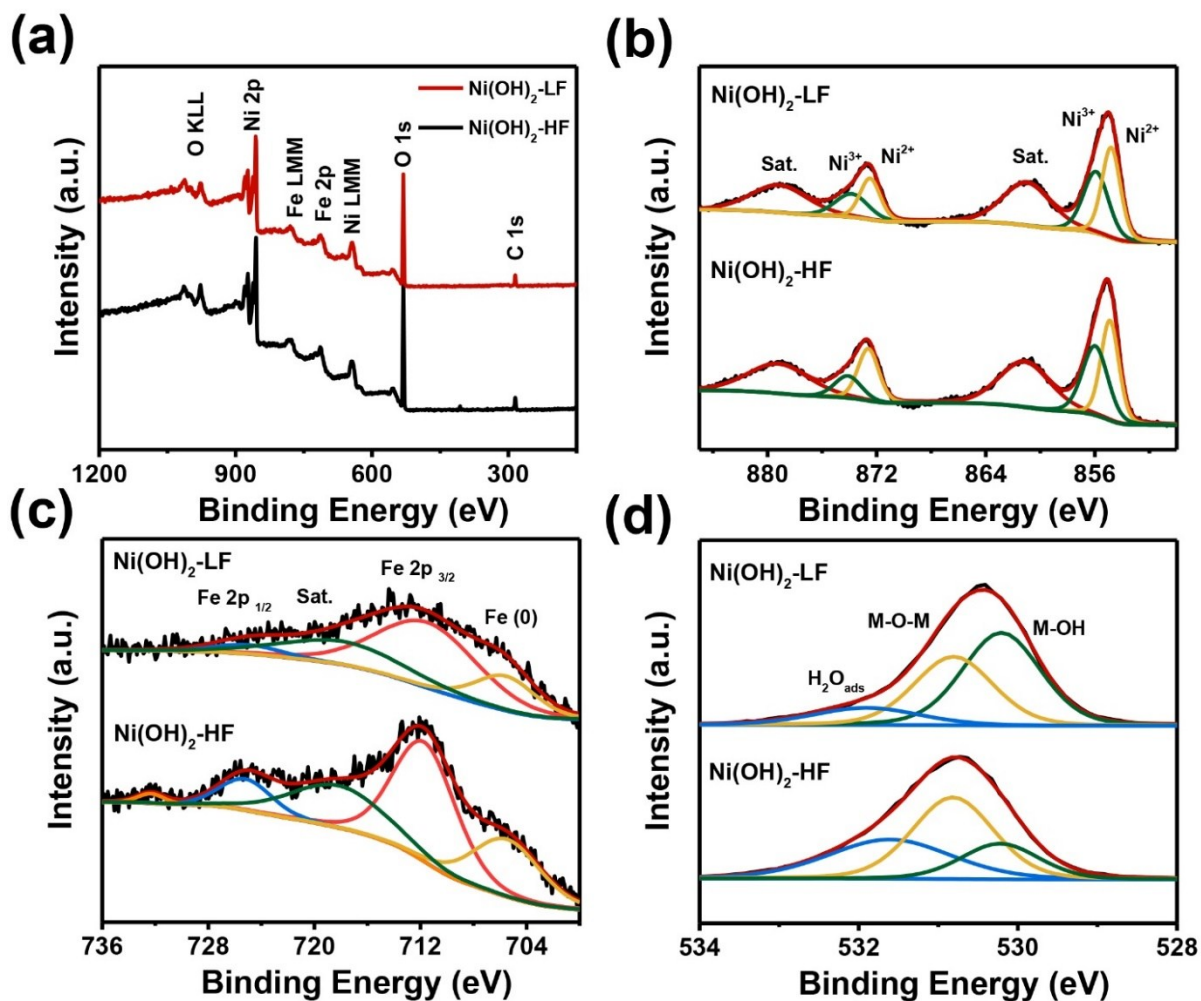

**Figure S2.** (a) XPS spectra of Ni(OH)<sub>2</sub>-HF and Ni(OH)<sub>2</sub>-LF. High resolution XPS spectra of (b) Ni, (c) Fe and (d) O in Ni(OH)<sub>2</sub>-HF and Ni(OH)<sub>2</sub>-LF, respectively.

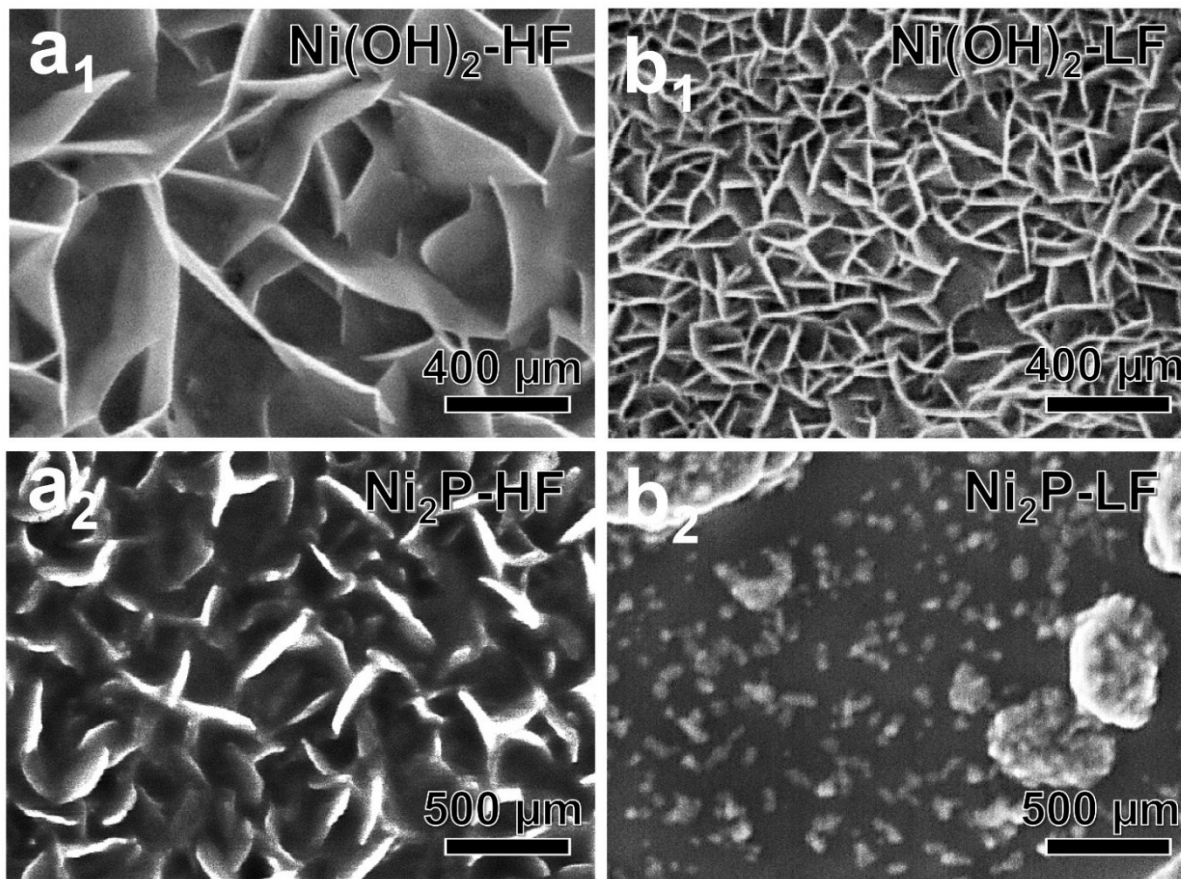

**Figure S3.** SEM images of (a<sub>1</sub>)  $\text{Ni(OH)}_2$ -HF and (b<sub>1</sub>)  $\text{Ni(OH)}_2$ -LF on SS mesh, respectively. SEM images of (a<sub>2</sub>)  $\text{Ni}_2\text{P}$ -HF and (b<sub>2</sub>)  $\text{Ni}_2\text{P}$ -LF, respectively.



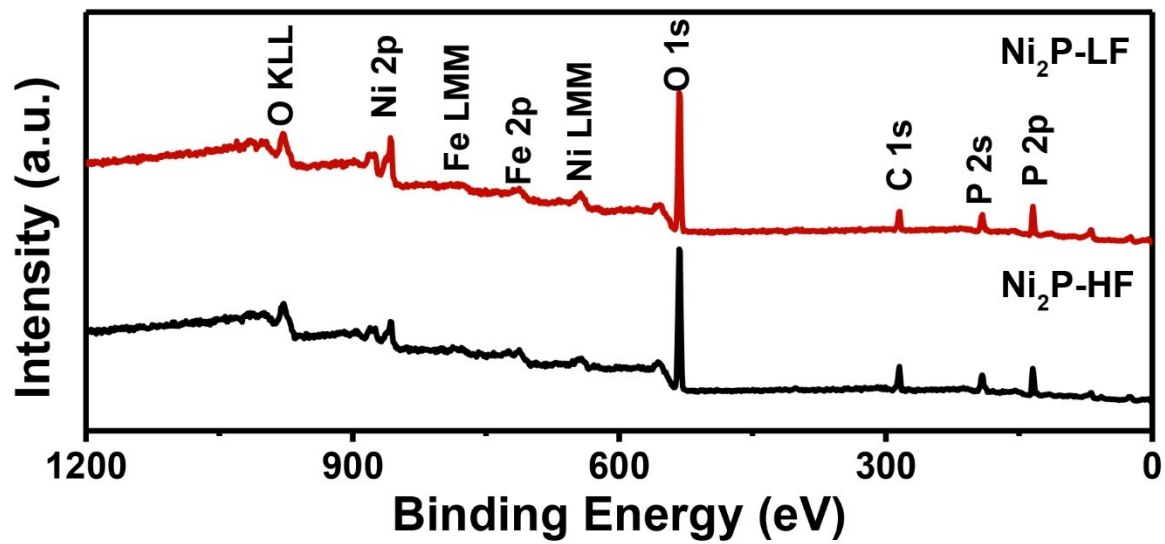

Figure S4. XPS spectra of Ni<sub>2</sub>P-HF and Ni<sub>2</sub>P-LF, respectively.

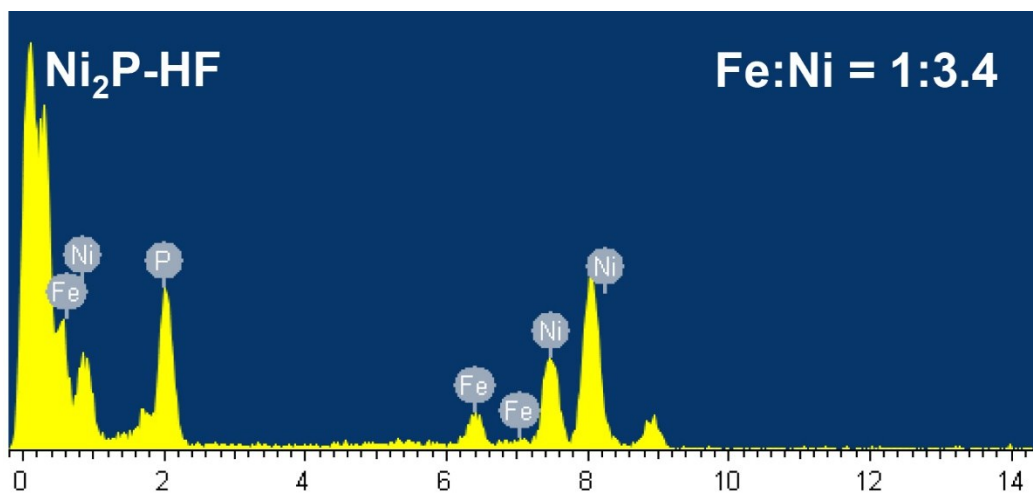

Figure S5. (a) EDX characterization of  $\text{Ni}_2\text{P-HF}$  sample.

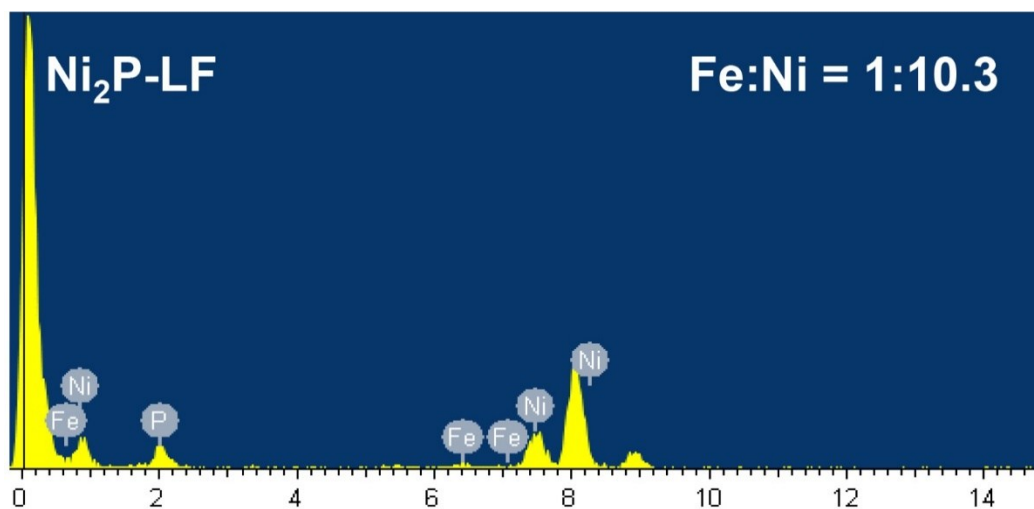

**Figure S6.** (a) EDX characterization of  $\text{Ni}_2\text{P-LF}$  sample.

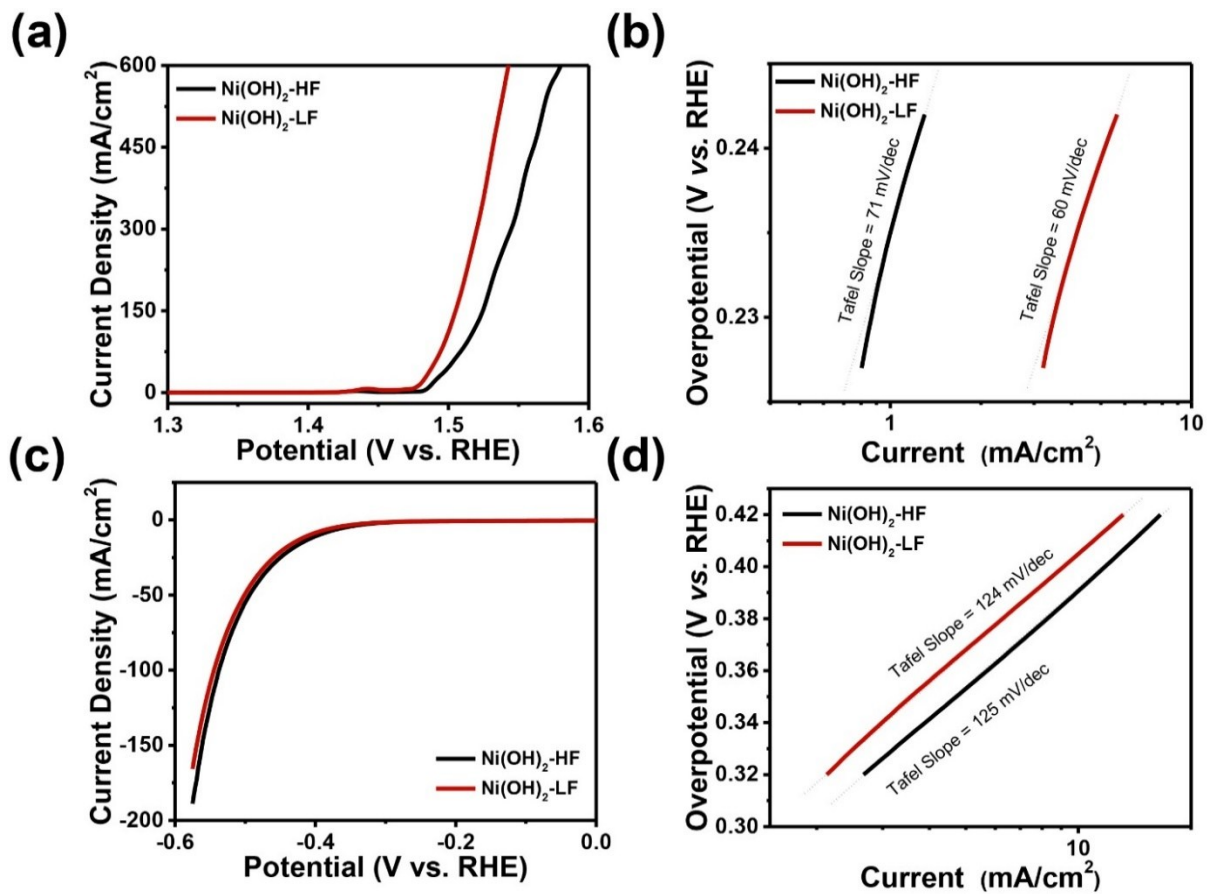

**Figure S7.** OER performance of Ni(OH)<sub>2</sub>-HF and Ni(OH)<sub>2</sub>-LF in 1.0 M KOH. (a) Polarization curves and (b) corresponding Tafel plots after iR compensation. HER performance of Ni(OH)<sub>2</sub>-HF and Ni(OH)<sub>2</sub>-LF in 1.0 M KOH. (c) Polarization curves and (d) corresponding Tafel plots after iR compensation.

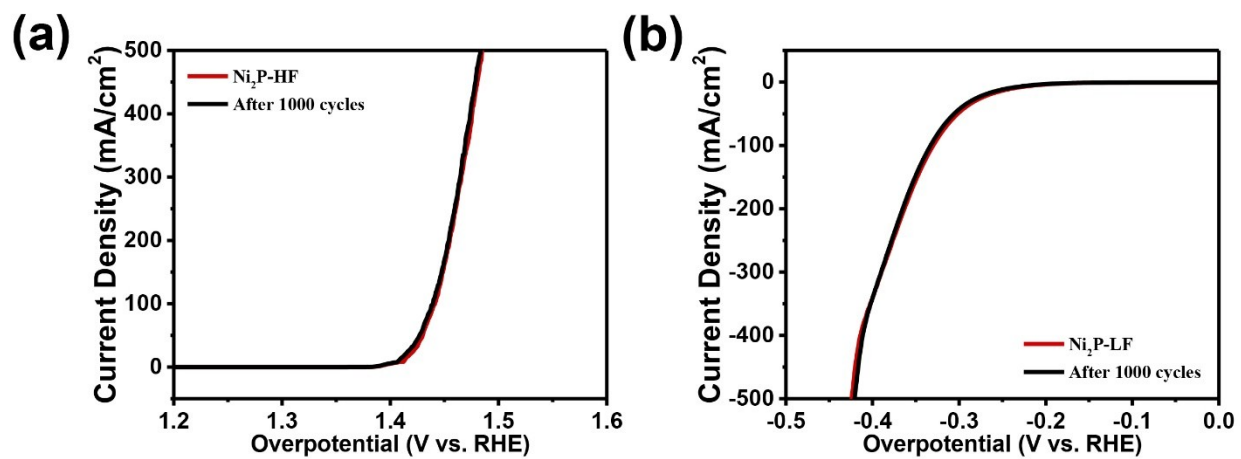

**Figure S8.** Durability tests of (a) Ni<sub>2</sub>P-HF and (b) Ni<sub>2</sub>P-LF in 1.0 M KOH.

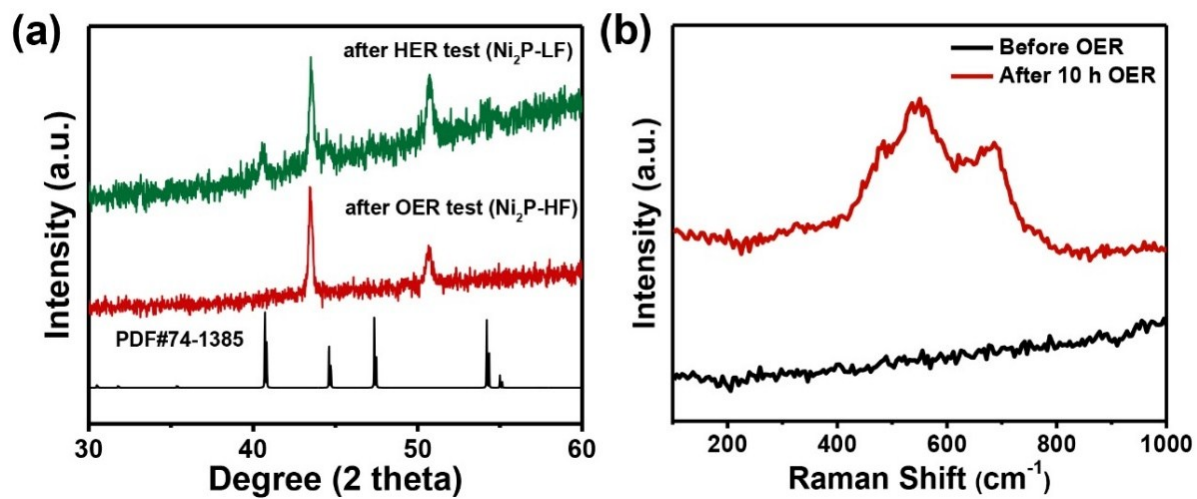

**Figure S9.** (a) XRD patterns of Ni<sub>2</sub>P-HF and Ni<sub>2</sub>P-LF after OER and HER test, respectively. (b) Raman spectrum of Ni<sub>2</sub>P-HF before and after OER reaction.

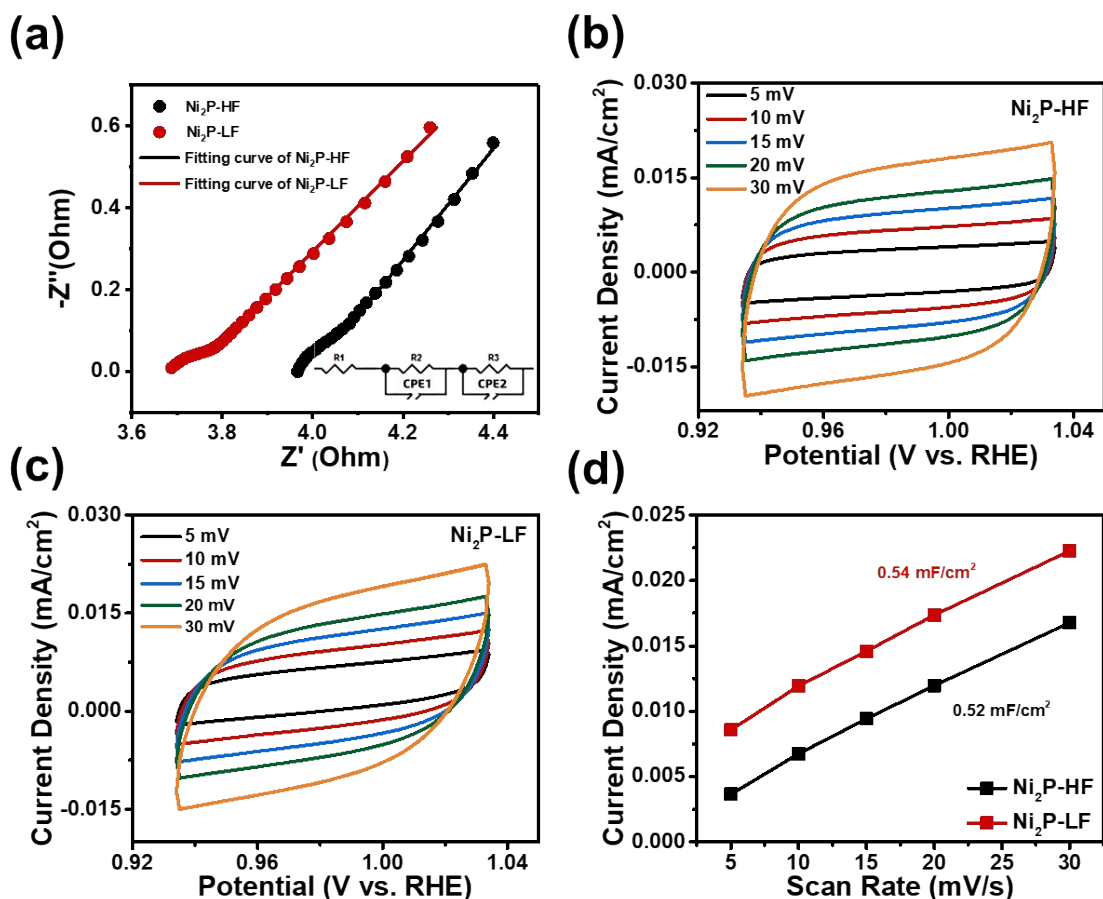

**Figure S10.** (a) Electrochemical impedance spectroscopy (EIS) Nyquist plots of  $\text{Ni}_2\text{P-HF}$  and  $\text{Ni}_2\text{P-LF}$ , the inset graph shows an electrical equivalent circuit model. Cyclic voltammograms with different scan rates obtained at non-faradaic potential region between 0.01 V and 0.11 V (vs. Hg/HgO) of (b)  $\text{Ni}_2\text{P-HF}$  and (c)  $\text{Ni}_2\text{P-LF}$ . (d) The differences in current density at 0.98 V vs RHE plotted as a function of scan rate, the slope of fitting line represents active electrochemical area of electrocatalyst.

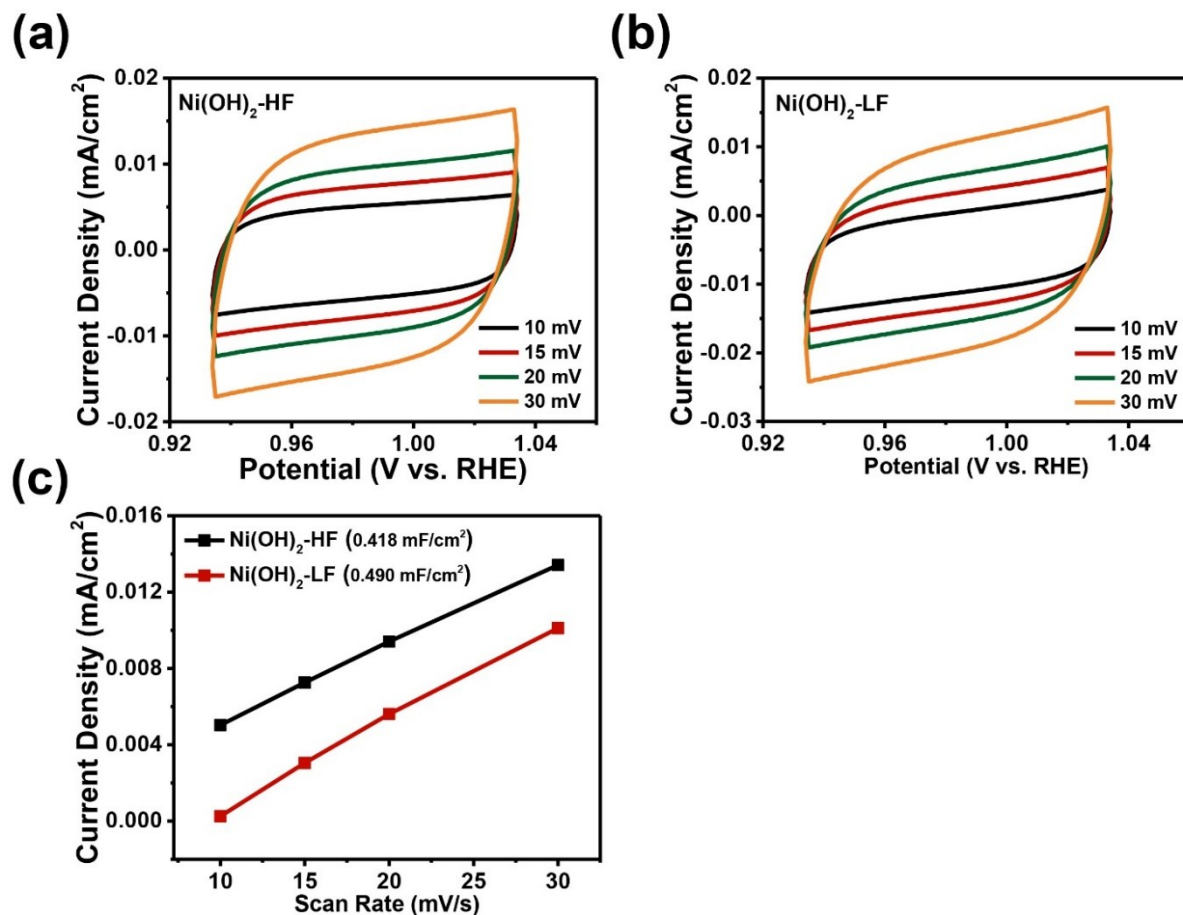

**Figure S11.** Cyclic voltammograms obtained at non-faradaic potential region between 0.01 V and 0.11 V (vs. Hg/HgO) of (a) Ni(OH)<sub>2</sub>-HF and (b) Ni(OH)<sub>2</sub>-LF samples, respectively. (c) The differences in current density at 0.98 V vs RHE plotted as a function of scan rate, the slope of fitting line represents active electrochemical area of electrocatalyst.



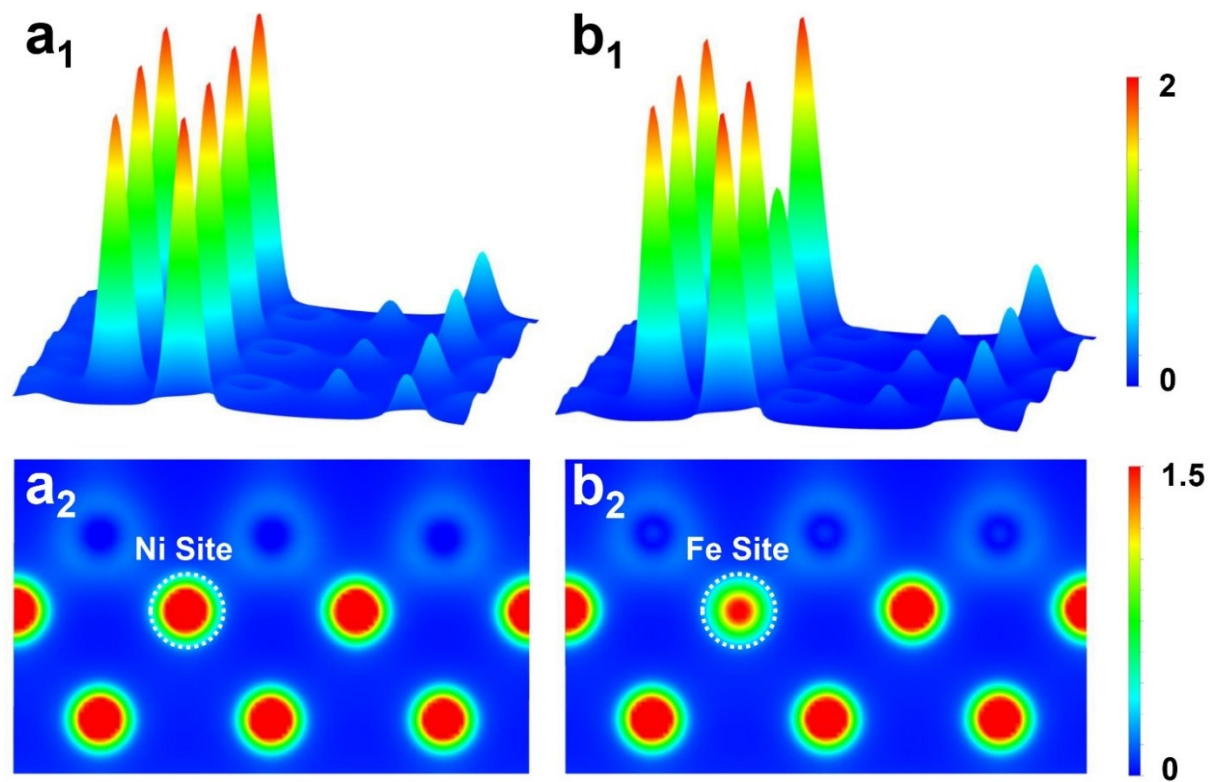

**Figure S12.** Electron density contour maps for  $\text{Ni}_2\text{P}$  surface ( $a_1$ - $a_2$ ) without and ( $b_1$ - $b_2$ ) with Fe dopant. ( $a_1$ ) and ( $b_1$ ) are bird's-eye view.

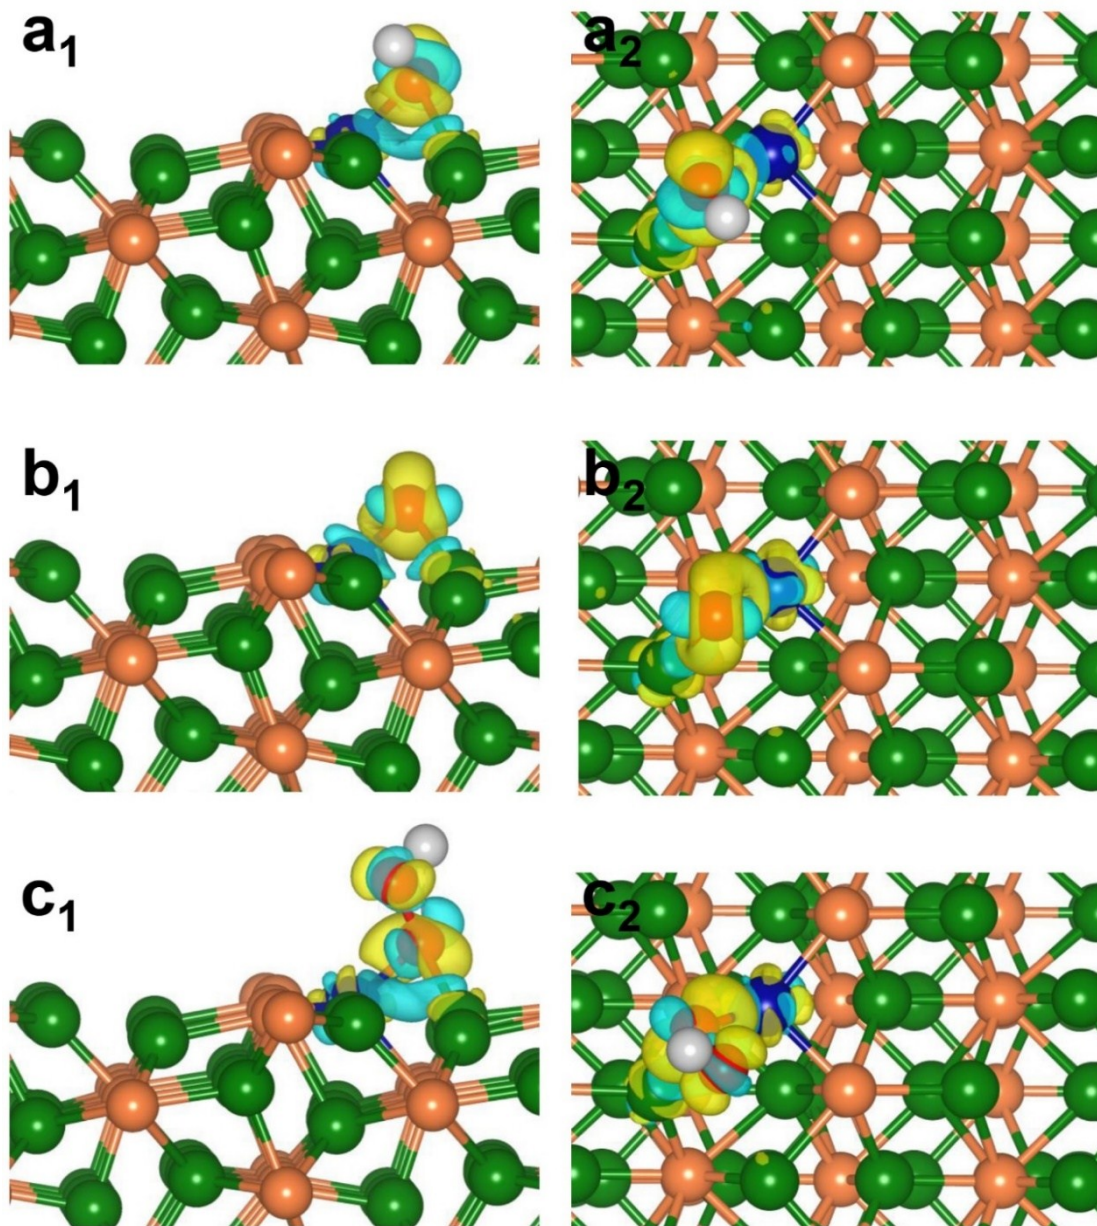

**Figure S13.** (a<sub>1</sub>) Side view and (a<sub>2</sub>) top view of the charge density difference of the OH<sup>\*</sup>-adsorbed on Fe-doped Ni<sub>2</sub>P surface. (b<sub>1</sub>) Side view and (b<sub>2</sub>) top view of the charge density difference of the O<sup>\*</sup>-adsorbed on Fe-doped Ni<sub>2</sub>P surface. (c<sub>1</sub>) Side view and (c<sub>2</sub>) top view of the charge density difference of the OOH<sup>\*</sup>-adsorbed on Fe-doped Ni<sub>2</sub>P surface. The yellow and blue isosurfaces represent charge accumulation and depletion, respectively. The isovalue is 0.005 au. For clarity, the symmetric parts of the optimized slabs at the bottom are not shown.

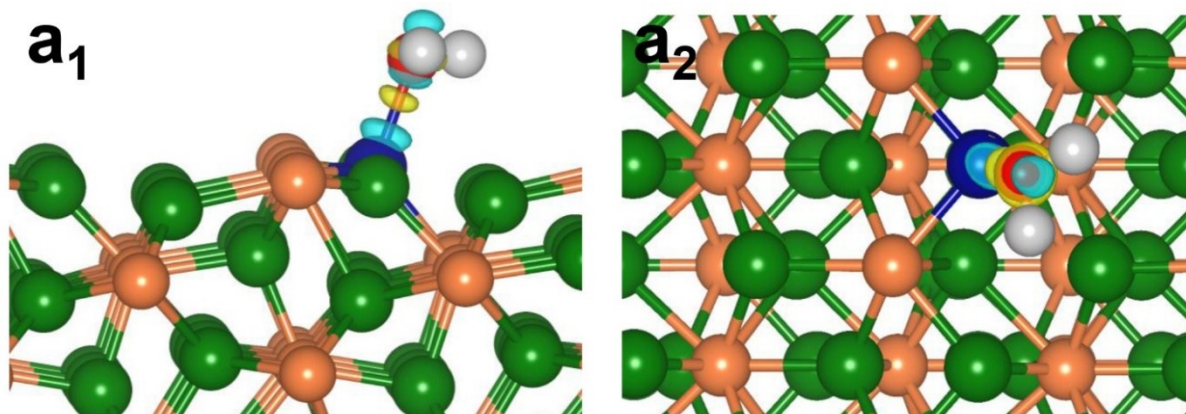

**Figure S14.** (a<sub>1</sub>) Side view and (a<sub>2</sub>) top view of the charge density difference of the H<sub>2</sub>O-adsorbed on Fe-doped Ni<sub>2</sub>P surface. The yellow and blue isosurfaces represent charge accumulation and depletion, respectively. The isovalue is 0.005 au. For clarity, the symmetric parts of the optimized slabs at the bottom are not shown.

**Table S1.** Elemental composition analysis of Ni<sub>2</sub>P-HF and Ni<sub>2</sub>P-LF.

|                           | <b>Content of Fe</b> | <b>Content of Ni</b> | <b>Content of P</b> |
|---------------------------|----------------------|----------------------|---------------------|
| <b>Ni<sub>2</sub>P-HF</b> | 7.51%                | 22.46%               | 70.03%              |
| <b>Ni<sub>2</sub>P-LF</b> | 3.37%                | 34.46%               | 62.17%              |

**Table S2.** Comparison of OER performance of self-supported Fe-doped Nickel Phosphides.

|                                                                | <b>Overpotential for OER</b>          | <b>Tafel Slope</b> | <b>References</b>                   |
|----------------------------------------------------------------|---------------------------------------|--------------------|-------------------------------------|
| <b>Ni<sub>1.85</sub>Fe<sub>0.15</sub>P/Ni foam</b>             | 380 mV @ 200 mA/cm <sup>2</sup>       | 96 mV/dec          | Wang Pengyan et al. <sup>[1]</sup>  |
| <b>NiFe-OH/NiFeP/Ni foam</b>                                   | 255 mV @ 300 mA/cm <sup>2</sup>       | 39 mV/dec          | Liang Hanfeng et al. <sup>[2]</sup> |
| <b>Amorphous Metallic NiFeP</b>                                | 390 mV @ 400 mA/cm <sup>2</sup>       | 42 mV/dec          | Hu Fei et al. <sup>[3]</sup>        |
| <b>Fe-doped Ni<sub>2</sub>P/Carbon cloth</b>                   | 310 mV @ 300 mA/cm <sup>2</sup>       | 48 mV/dec          | Wang Jianmei et al. <sup>[4]</sup>  |
| <b>(Fe<sub>0.5</sub>Ni<sub>0.5</sub>)<sub>2</sub>P/Ni foam</b> | 260 mV @ 500 mA/cm <sup>2</sup>       | 66 mV/dec          | Zhang Bowei et al. <sup>[5]</sup>   |
| <b>Fe(PO<sub>3</sub>)<sub>2</sub>/Ni<sub>2</sub>P /Ni foam</b> | 265 mV @ 500 mA/cm <sup>2</sup>       | 51.9 mV/dec        | Zhou Haiqing et al. <sup>[6]</sup>  |
| <b>FeNiP/Ni foam</b>                                           | 240 mV @ 60 mA/cm <sup>2</sup>        | 76 mV/dec          | Manman Qian et al. <sup>[7]</sup>   |
| <b>Fe-doped Ni<sub>2</sub>P/SS</b>                             | <b>255 mV @ 500 mA/cm<sup>2</sup></b> | <b>29.1 mV/dec</b> | <b>This work</b>                    |

**Table S3.** Comparison of overpotentials for HER and OER reactions.

|                                                       | <b>Overpotential for HER</b>          | <b>Overpotential for OER</b>          | <b>References</b>                              |
|-------------------------------------------------------|---------------------------------------|---------------------------------------|------------------------------------------------|
| <b>NiP/Ni foam</b>                                    | 185 mV @ 60 mA/cm <sup>2</sup>        | 320 mV @ 100 mA/cm <sup>2</sup>       | Chen Gaofeng et al. <sup>[8]</sup>             |
| <b>Fe-doped Ni<sub>2</sub>P/Ni foam</b>               | 310 mV @ 200 mA/cm <sup>2</sup>       | 260 mV @ 300 mA/cm <sup>2</sup>       | Li Yingjie et al. <sup>[9]</sup>               |
| <b>N- and P-doped SS</b>                              | > 400 mV @ 100 mA/cm <sup>2</sup>     | > 600 mV @ 100 mA/cm <sup>2</sup>     | Balogun Muhammad-Sadeeq et al. <sup>[10]</sup> |
| <b>Fe/Ni Phosphides on Ni foam</b>                    | 230 mV @ 400 mA/cm <sup>2</sup>       | 290 mV @ 400 mA/cm <sup>2</sup>       | Xiao Chunhui et al. <sup>[11]</sup>            |
| <b>N-doped Ni<sub>3</sub>S<sub>2</sub>/Ni foam</b>    | 250 mV @ 160 mA/cm <sup>2</sup>       | 380 mV @ 400 mA/cm <sup>2</sup>       | Chen Pengzuo et al. <sup>[12]</sup>            |
| <b>NiFe LDH/Cu foam</b>                               | 192 mV @ 100 mA/cm <sup>2</sup>       | 311 mV @ 500 mA/cm <sup>2</sup>       | Yu Luo et al. <sup>[13]</sup>                  |
| <b>MoO<sub>x</sub>/Ni<sub>3</sub>S<sub>2</sub>/Ni</b> | 480 mV @ 500 mA/cm <sup>2</sup>       | 520 mV @ 500 mA/cm <sup>2</sup>       | Wu Yuanyuan et al. <sup>[14]</sup>             |
| <b>Co-Mn carbonate hydroxide/Ni foam</b>              | 450 mV @ 500 mA/cm <sup>2</sup>       | 400 mV @ 500 mA/cm <sup>2</sup>       | Tang Tang et al. <sup>[15]</sup>               |
| <b>Fe-doped Ni<sub>2</sub>P/SS</b>                    | <b>400 mV @ 500 mA/cm<sup>2</sup></b> | <b>255 mV @ 500 mA/cm<sup>2</sup></b> | <b>This work</b>                               |

**Table S4.** Comparison of potentials for overall water splitting in two-electrode system.

|                                                                                                                               | Potential                             | References                                  |
|-------------------------------------------------------------------------------------------------------------------------------|---------------------------------------|---------------------------------------------|
| <b>Ni<sub>1.85</sub>Fe<sub>0.15</sub>P/Ni foam    Ni<sub>1.85</sub>Fe<sub>0.15</sub>P/Ni foam</b>                             | 1.87 V @ 100 mA/cm <sup>2</sup>       | Wang Pengyan et al. <sup>[1]</sup>          |
| <b>IrO<sub>2</sub>/Ni foam    Pt-C/Ni foam</b>                                                                                | 1.77 V @ 100 mA/cm <sup>2</sup>       |                                             |
| <b>Ni<sub>2</sub>P/Ni foam    Ni<sub>2</sub>P/Ni foam</b>                                                                     | 1.82 V @ 100 mA/cm <sup>2</sup>       | Menezes Prashanth W. et al. <sup>[16]</sup> |
| <b>Co<sub>3</sub>Se<sub>4</sub>/Co foam    Co<sub>3</sub>Se<sub>4</sub>/Co foam</b>                                           | 1.88 V @ 100 mA/cm <sup>2</sup>       | Li Wei et al. <sup>[17]</sup>               |
| <b>RuO<sub>2</sub>/Co foam    Pt-C/Co foam</b>                                                                                | 1.90 V @ 100 mA/cm <sup>2</sup>       |                                             |
| <b>NiP /Ni foam    NiP/Ni foam</b>                                                                                            | 1.80 V @ 40 m A/cm <sup>2</sup>       | Chen Gaofeng et al. <sup>[8]</sup>          |
| <b>(Ni<sub>0.33</sub>Fe<sub>0.67</sub>)<sub>2</sub>P/Ni foam    (Ni<sub>0.33</sub>Fe<sub>0.67</sub>)<sub>2</sub>P/Ni foam</b> | 1.73 V @ 100 mA/cm <sup>2</sup>       | Li Yingjie et al. <sup>[9]</sup>            |
| <b>FeNiP<sub>x</sub>/Ni foam    FeNiP<sub>x</sub>/Ni foam</b>                                                                 | 1.85 V @ 100 mA/cm <sup>2</sup>       | Xiao Chunhui et al. <sup>[11]</sup>         |
| <b>NiCoP/Ni foam    NiCoP/Ni foam</b>                                                                                         | 1.83 V @ 100 mA/cm <sup>2</sup>       | Liang Hanfeng et al. <sup>[2]</sup>         |
| <b>N-Ni<sub>3</sub>S<sub>2</sub>/Ni foam    N-Ni<sub>3</sub>S<sub>2</sub>/Ni foam</b>                                         | 1.82 V@ 100 mA/cm <sup>2</sup>        | Chen Pengzuo et al. <sup>[12]</sup>         |
| <b>Fe-doped Ni<sub>2</sub>P (1h)/SS    Fe-doped Ni<sub>2</sub>P (3h)/SS</b>                                                   | <b>1.80 V @ 100 mA/cm<sup>2</sup></b> | <b>This work</b>                            |

## Reference

- [1] P. Wang, Z. Pu, Y. Li, L. Wu, Z. Tu, M. Jiang, Z. Kou, I. S. Amiinu, S. Mu, *ACS Appl. Mater. Inter.* **2017**, *9*, 26001.
- [2] H. Liang, A. N. Gandi, C. Xia, M. N. Hedhili, D. H. Anjum, U. Schwingenschlögl, H. N. Alshareef, *ACS Energy Lett.* **2017**, *2*, 1035.
- [3] F. Hu, S. Zhu, S. Chen, Y. Li, L. Ma, T. Wu, Y. Zhang, C. Wang, C. Liu, X. Yang, L. Song, X. Yang, Y. Xiong, *Adv. Mater.* **2017**, *29*, 1606570.
- [4] J. Wang, X. Ma, F. Qu, A. M. Asiri, X. Sun, *Inorg. Chem.* **2017**, *56*, 1041.
- [5] B. Zhang, Y. H. Lui, H. Ni, S. Hu, *Nano Energy* **2017**, *38*, 553.
- [6] H. Zhou, F. Yu, J. Sun, R. He, S. Chen, C.-W. Chu, Z. Ren, *Proc. Natl. Acad. Sci. USA* **2017**, *114*, 5607.
- [7] M. Qian, S. Cui, D. Jiang, L. Zhang, P. Du, *Adv. Mater.* **2017**, *29*, 1704075
- [8] G.-F. Chen, T. Y. Ma, Z.-Q. Liu, N. Li, Y.-Z. Su, K. Davey, S.-Z. Qiao, *Adv. Funct. Mater.* **2016**, *26*, 3314.
- [9] Y. Li, H. Zhang, M. Jiang, Q. Zhang, P. He, X. Sun, *Adv. Funct. Mater.* **2017**, *27*, 1702513.
- [10] M. S. Balogun, W. Qiu, Y. Huang, H. Yang, R. Xu, W. Zhao, G. R. Li, H. Ji, Y. Tong, *Adv. Mater.* **2017**, *29*, 1702095.
- [11] C. Xiao, B. Zhang, D. Li, *Electrochim. Acta* **2017**, *242*, 260.
- [12] P. Chen, T. Zhou, M. Zhang, Y. Tong, C. Zhong, N. Zhang, L. Zhang, C. Wu, Y. Xie, *Adv. Mater.* **2017**, *29*, 1701584.
- [13] L. Yu, H. Zhou, J. Sun, F. Qin, F. Yu, J. Bao, Y. Yu, S. Chen, Z. Ren, *Energ. Environ. Sci.* **2017**, *10*, 1820.



- [14] Y. Wu, G.-D. Li, Y. Liu, L. Yang, X. Lian, T. Asefa, X. Zou, *Adv. Funct. Mater.* **2016**, *26*, 4839.
- [15] T. Tang, W. J. Jiang, S. Niu, N. Liu, H. Luo, Y. Y. Chen, S. F. Jin, F. Gao, L. J. Wan, J. S. Hu, *J. Am. Chem. Soc.* **2017**, *139*, 8320.
- [16] P. W. Menezes, A. Indra, C. Das, C. Walter, C. Göbel, V. Gutkin, D. Schmeißer, M. Driess, *ACS Catal.* **2016**, *7*, 103.
- [17] W. Li, X. Gao, D. Xiong, F. Wei, W.-G. Song, J. Xu, L. Liu, *Adv. Energy Mater.* **2017**, *7*, 1602579.
